# Supplementary material for: Differential Roles of Tumor Necrosis Factor Ligand Superfamily Members as Biomarkers in Pancreatic Cancer
Source: PubMed Central journal article supplement (PMC6068811; doi:10.3390/jcm7070175), 2018-07-13

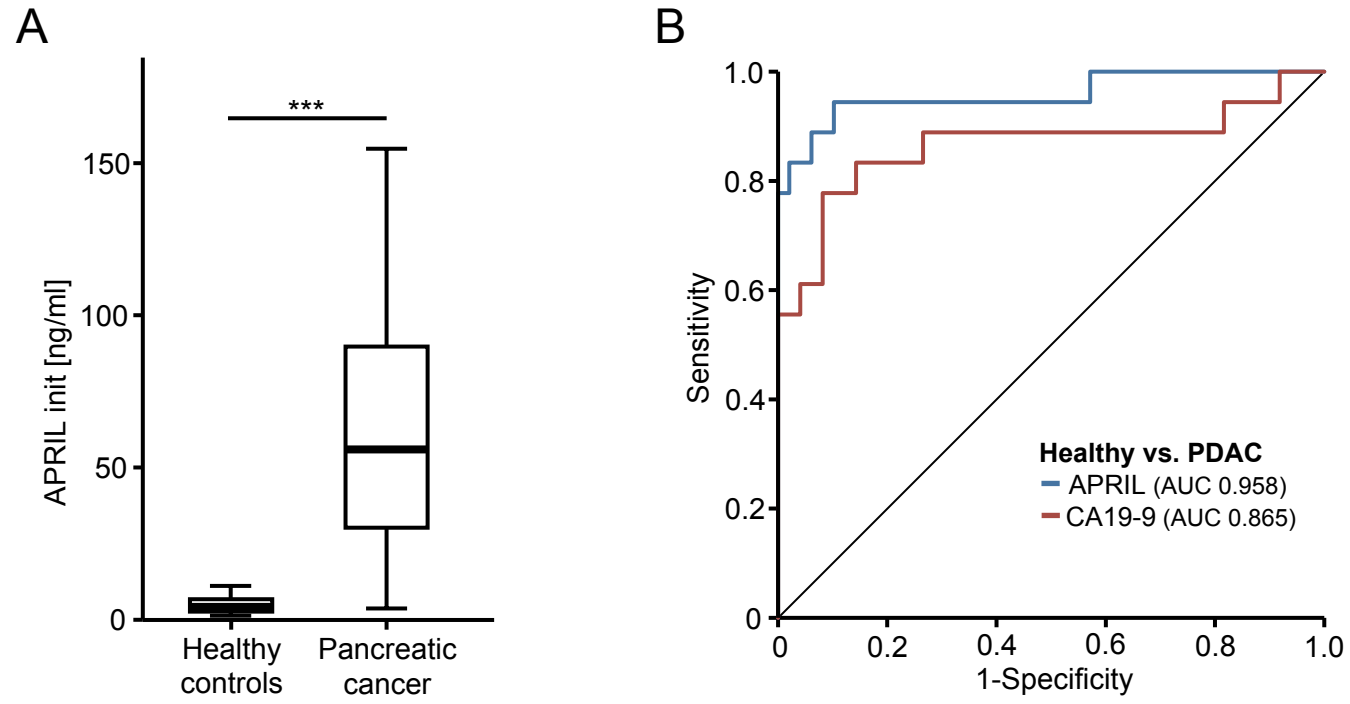

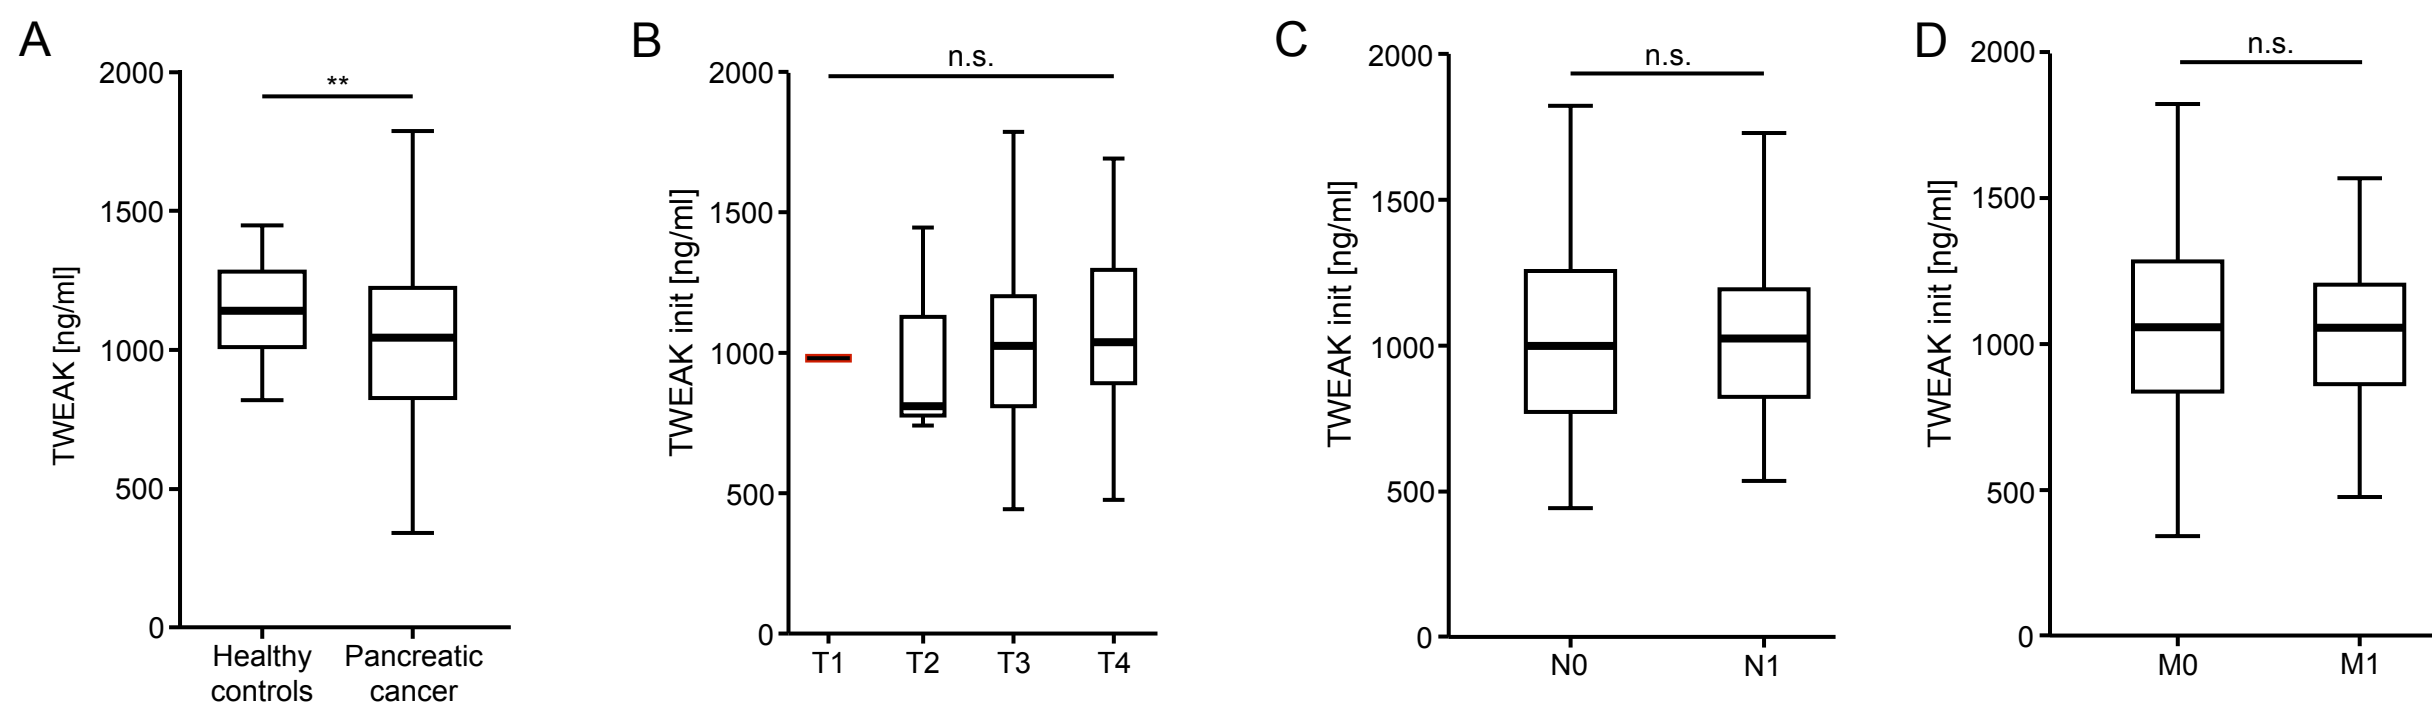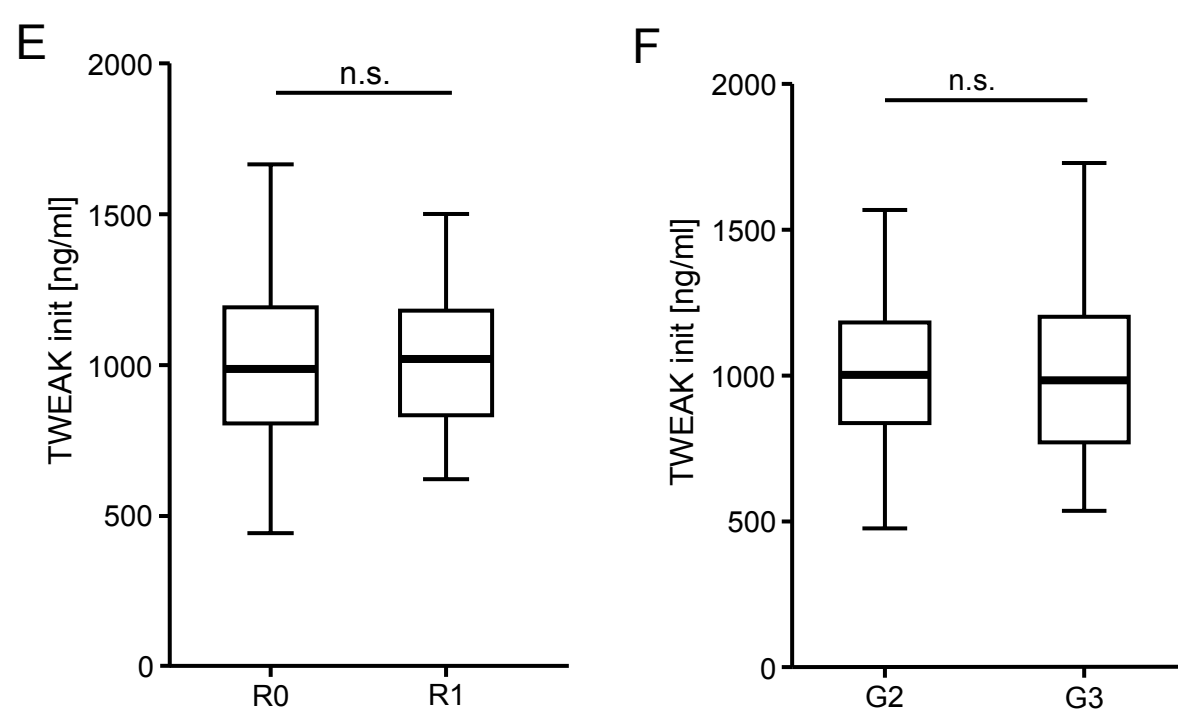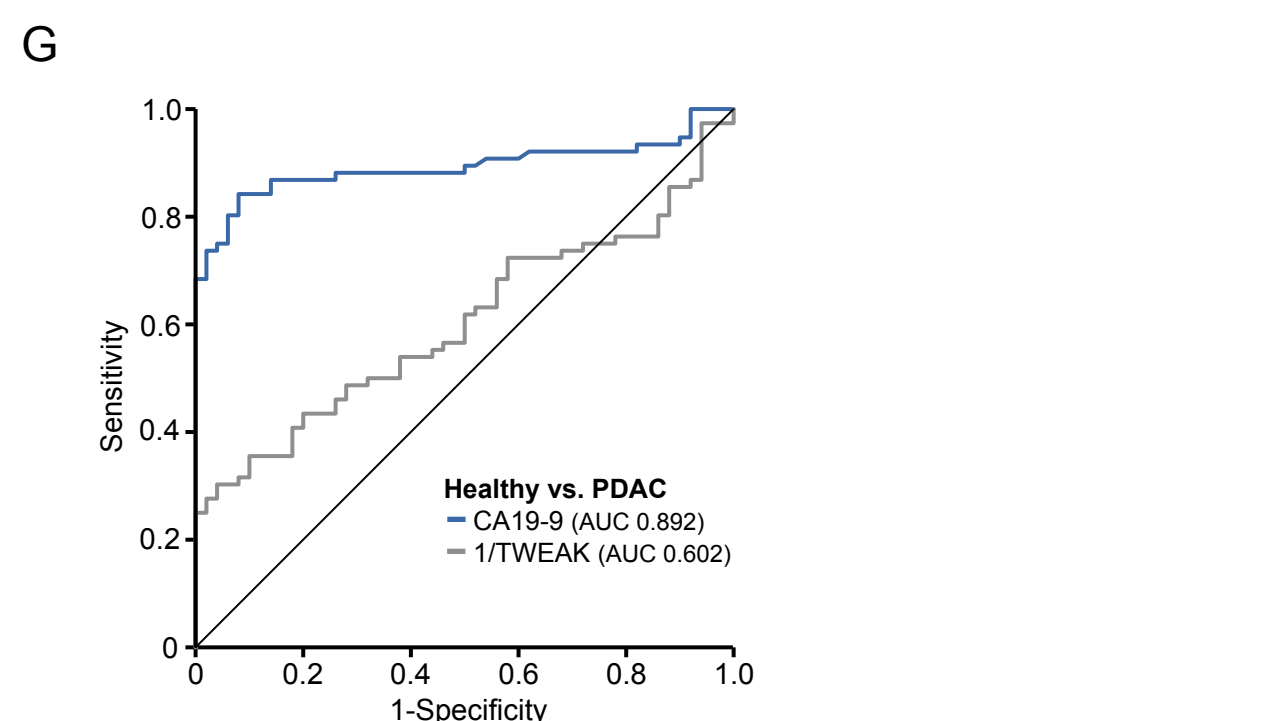

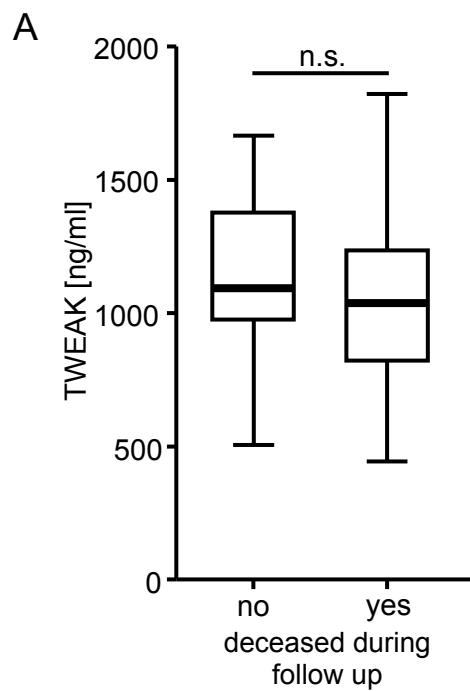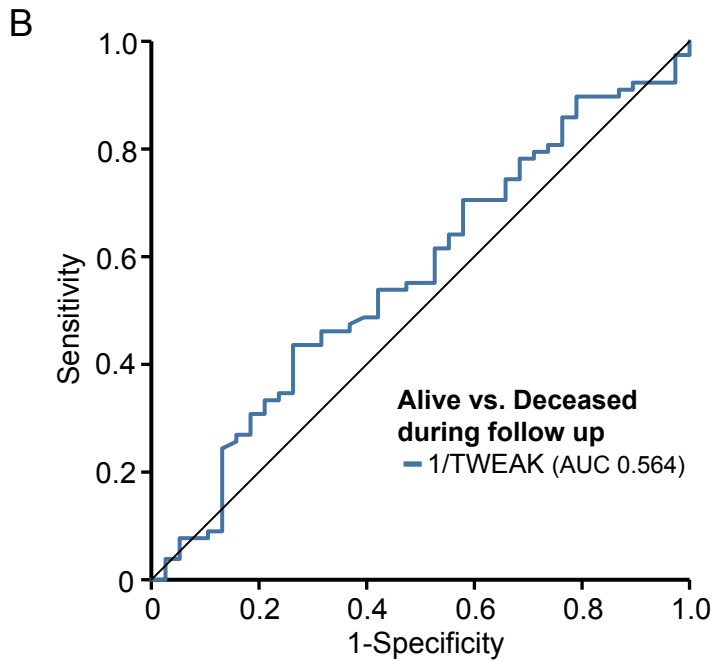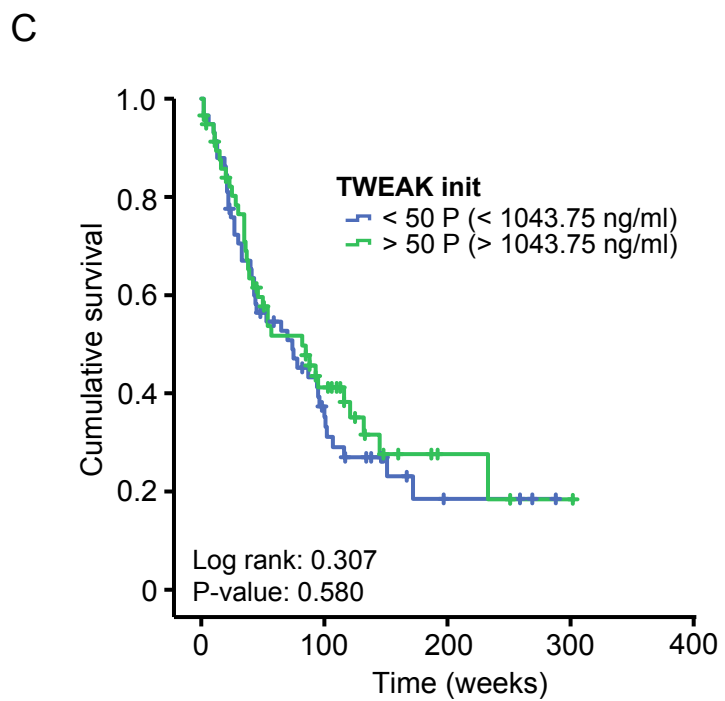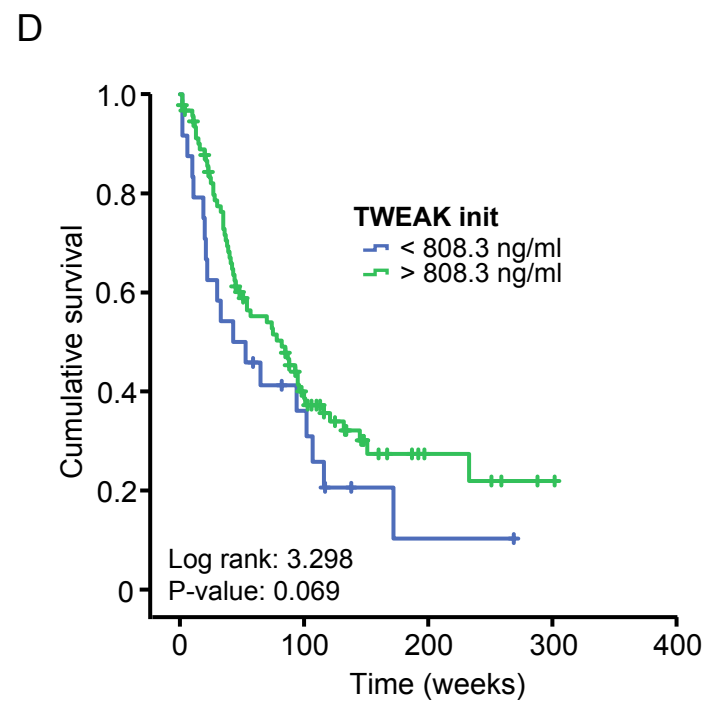

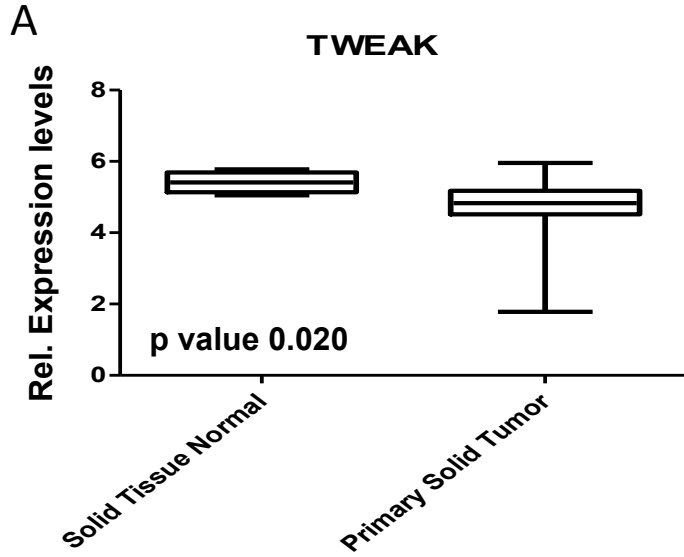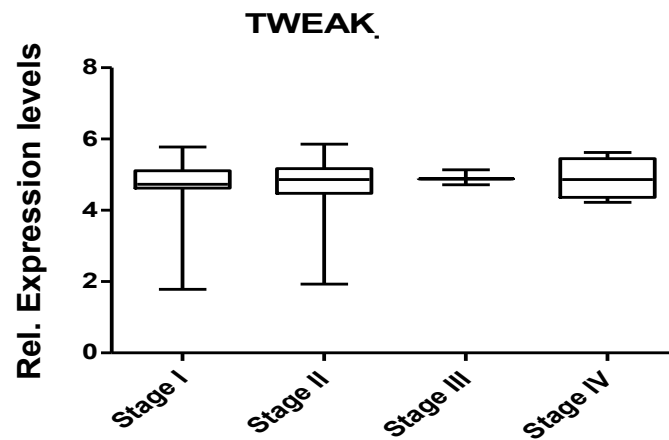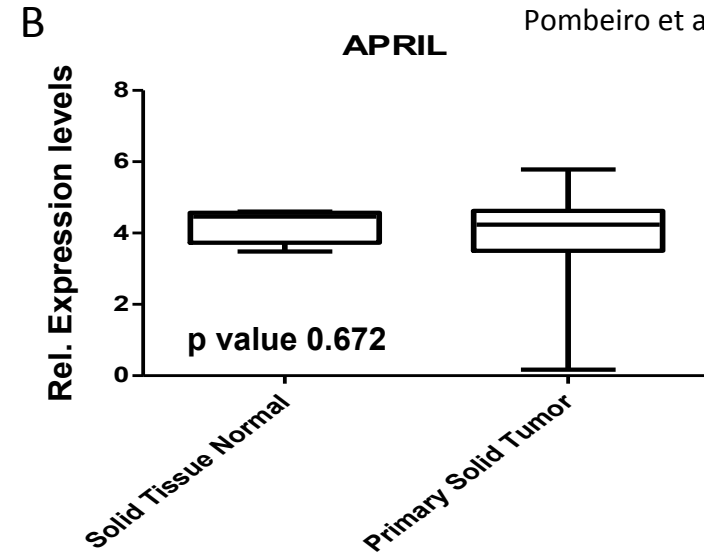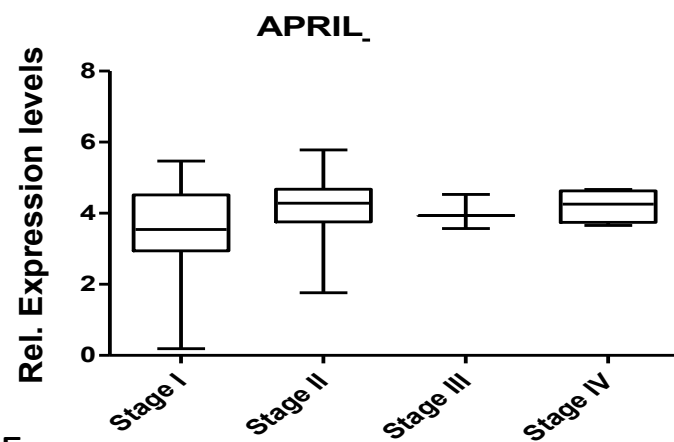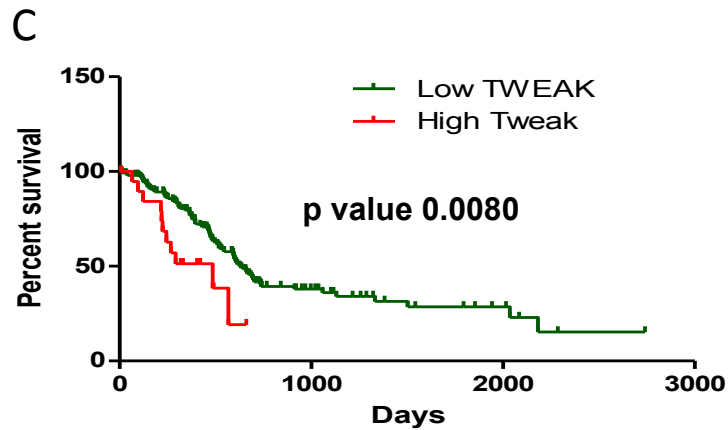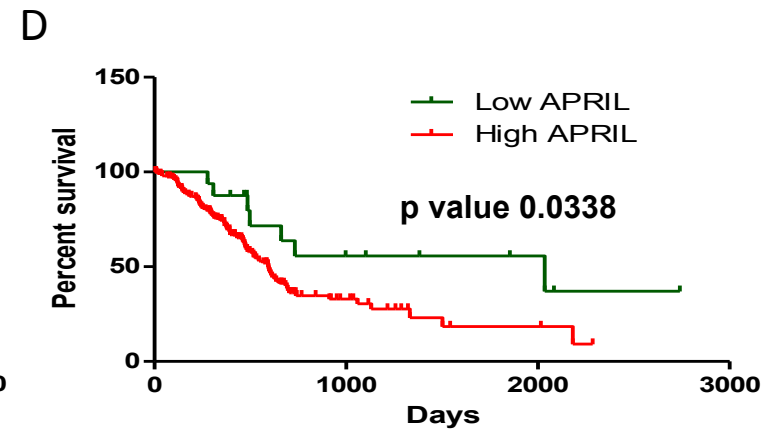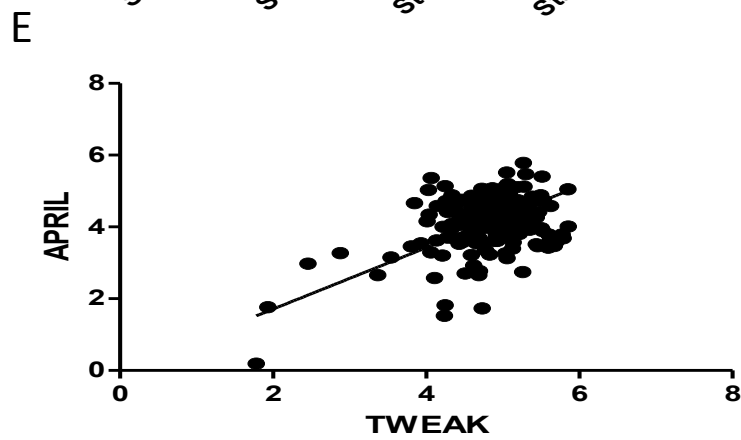

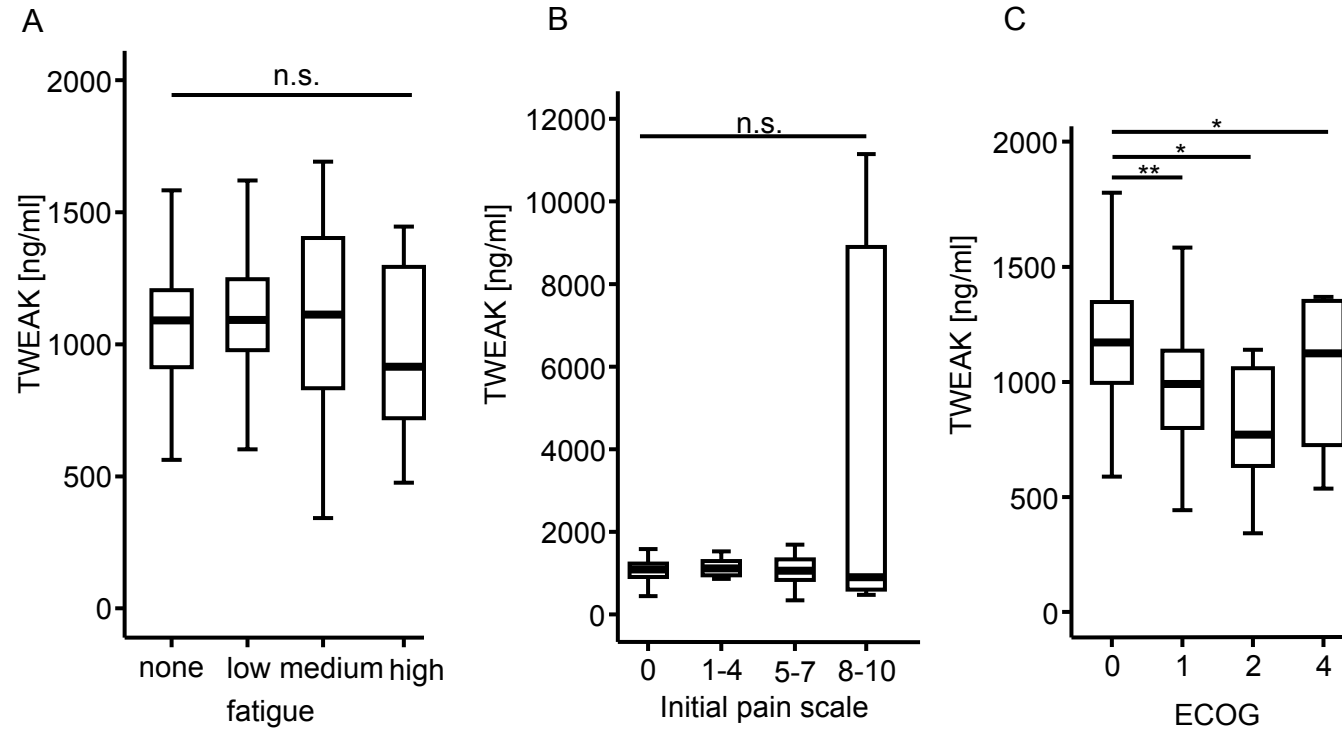

Supplement: jcm-07-00175-s001.pdf [file jcm-07-00175-s001.pdf]
